# Supplementary material for: A versatile 5′ RACE-Seq methodology for the accurate identification of the 5′ termini of mRNAs
Source: PubMed Central journal article supplement (PMC8881849; doi:10.1186/s12864-022-08386-y), 2022-02-26

## **Original IGV figures**

Original IGV figures demonstrating the aligned sequencing reads derived from our custom designed 5' RACE-seq approach, which confirm the existence of annotated and novel UTRs for several members of the human *KLK* gene family. The human genome hg38 (GRCh38) was used as reference for the alignment process with minimap2.

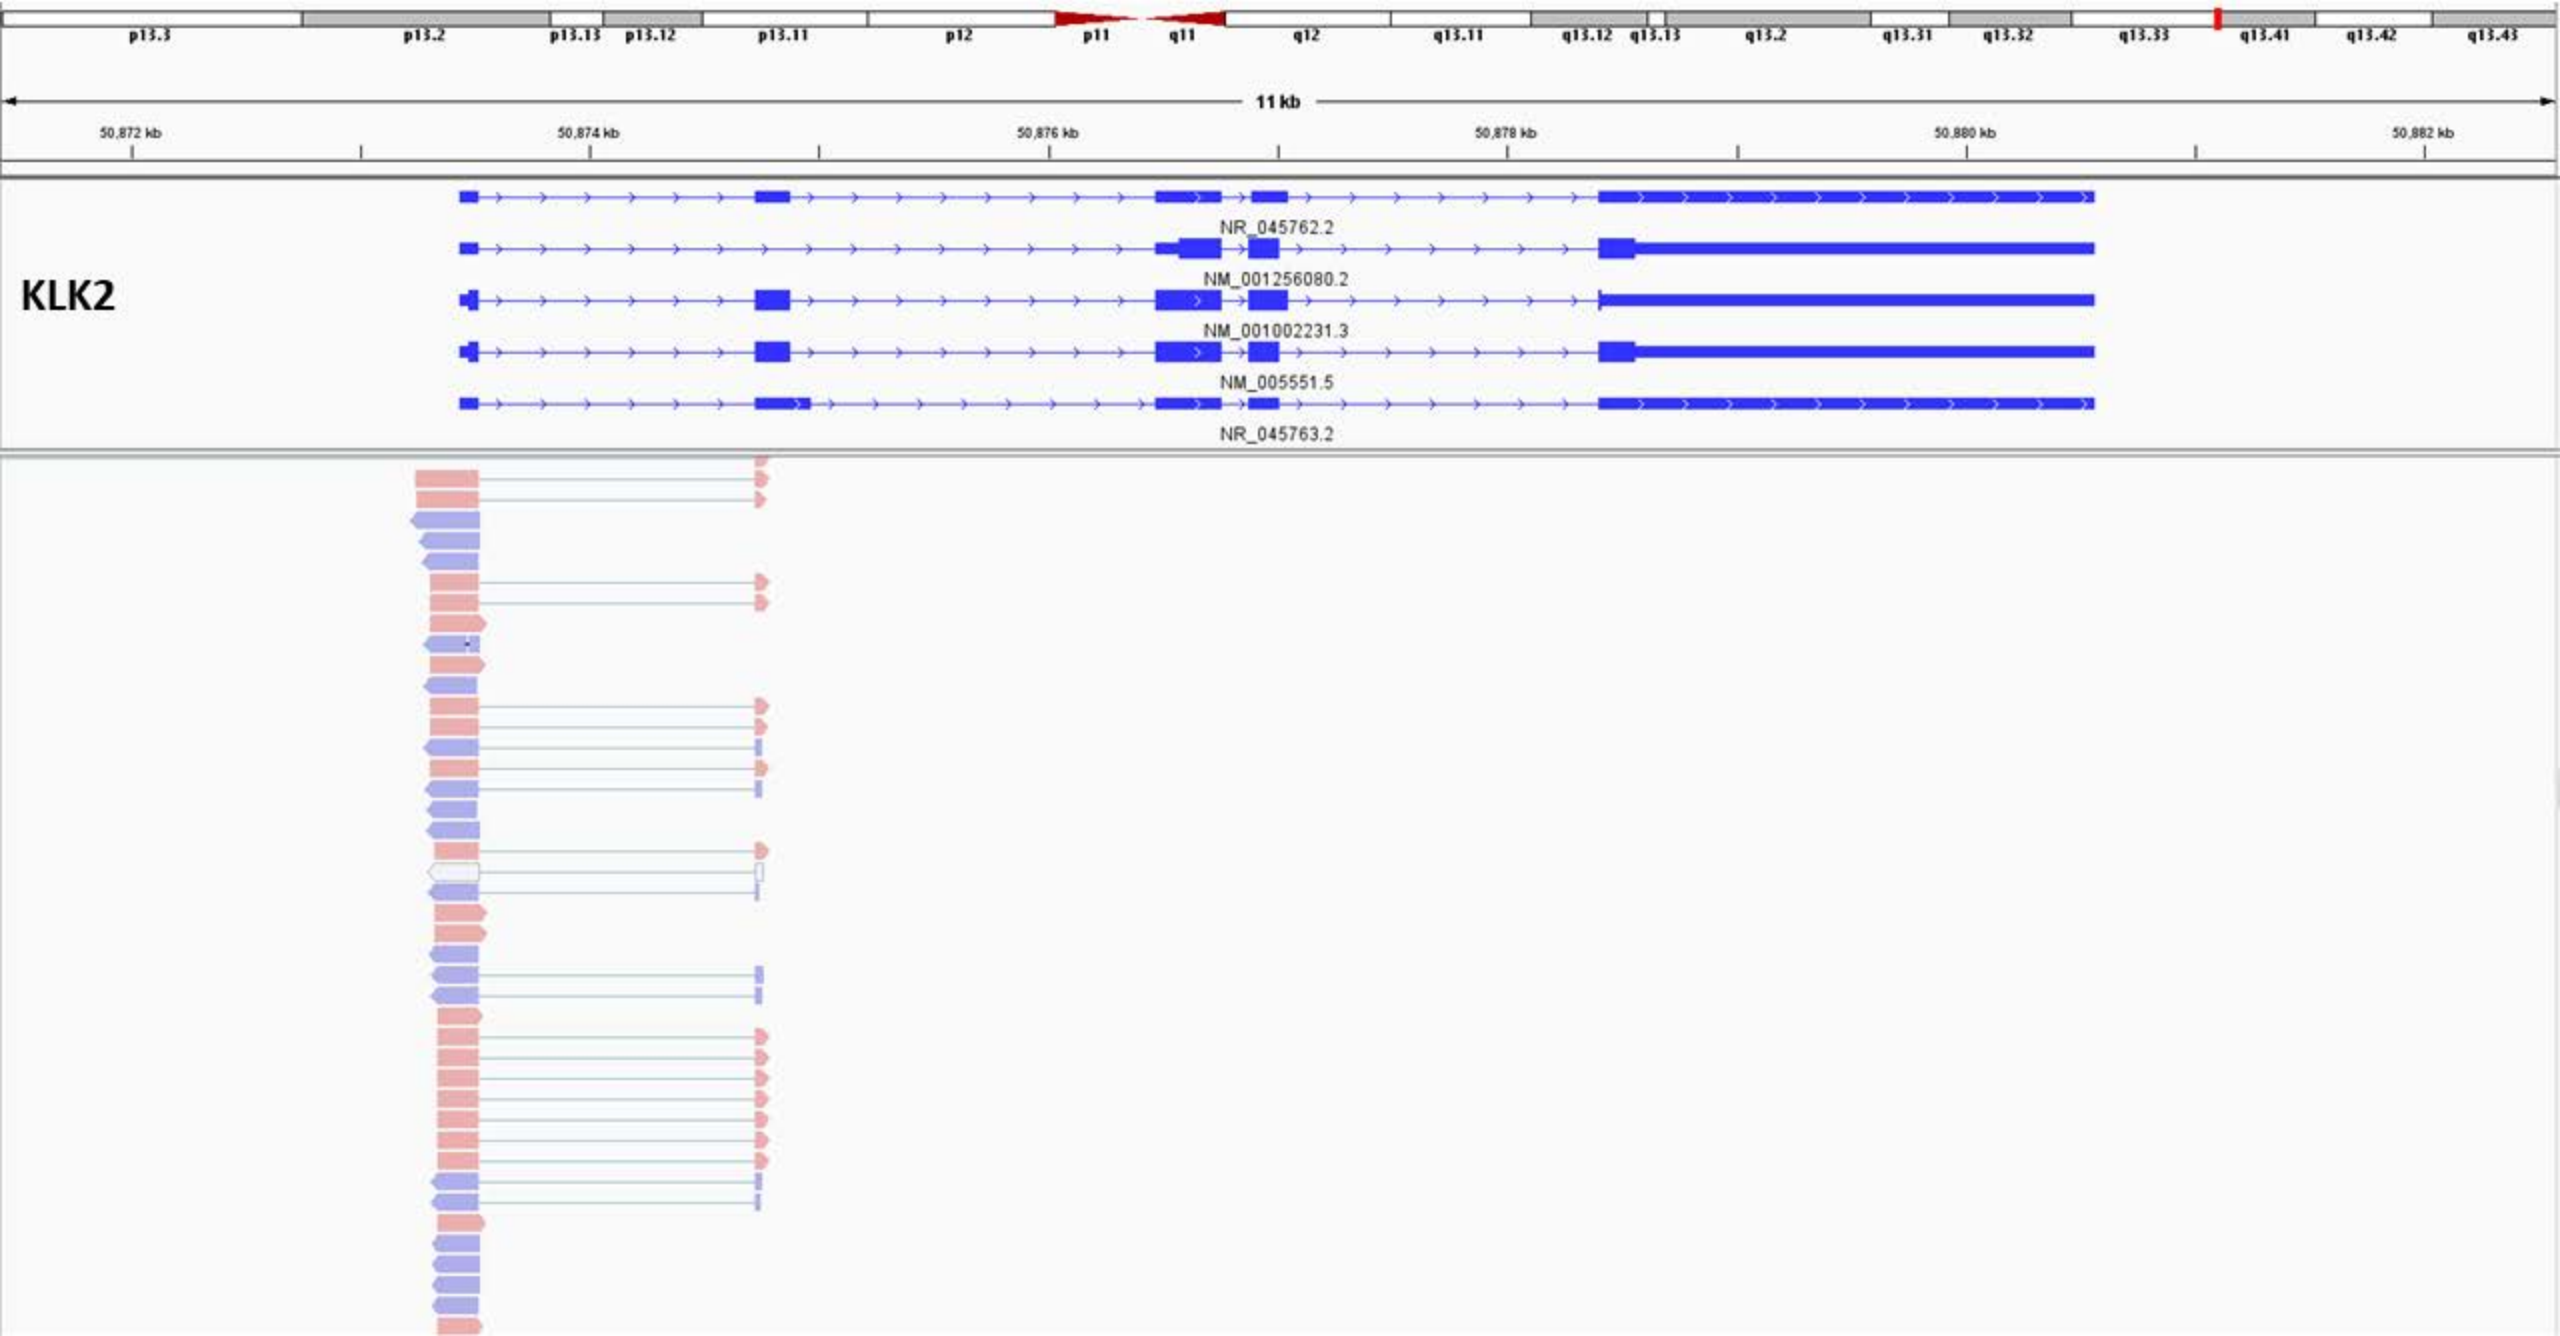

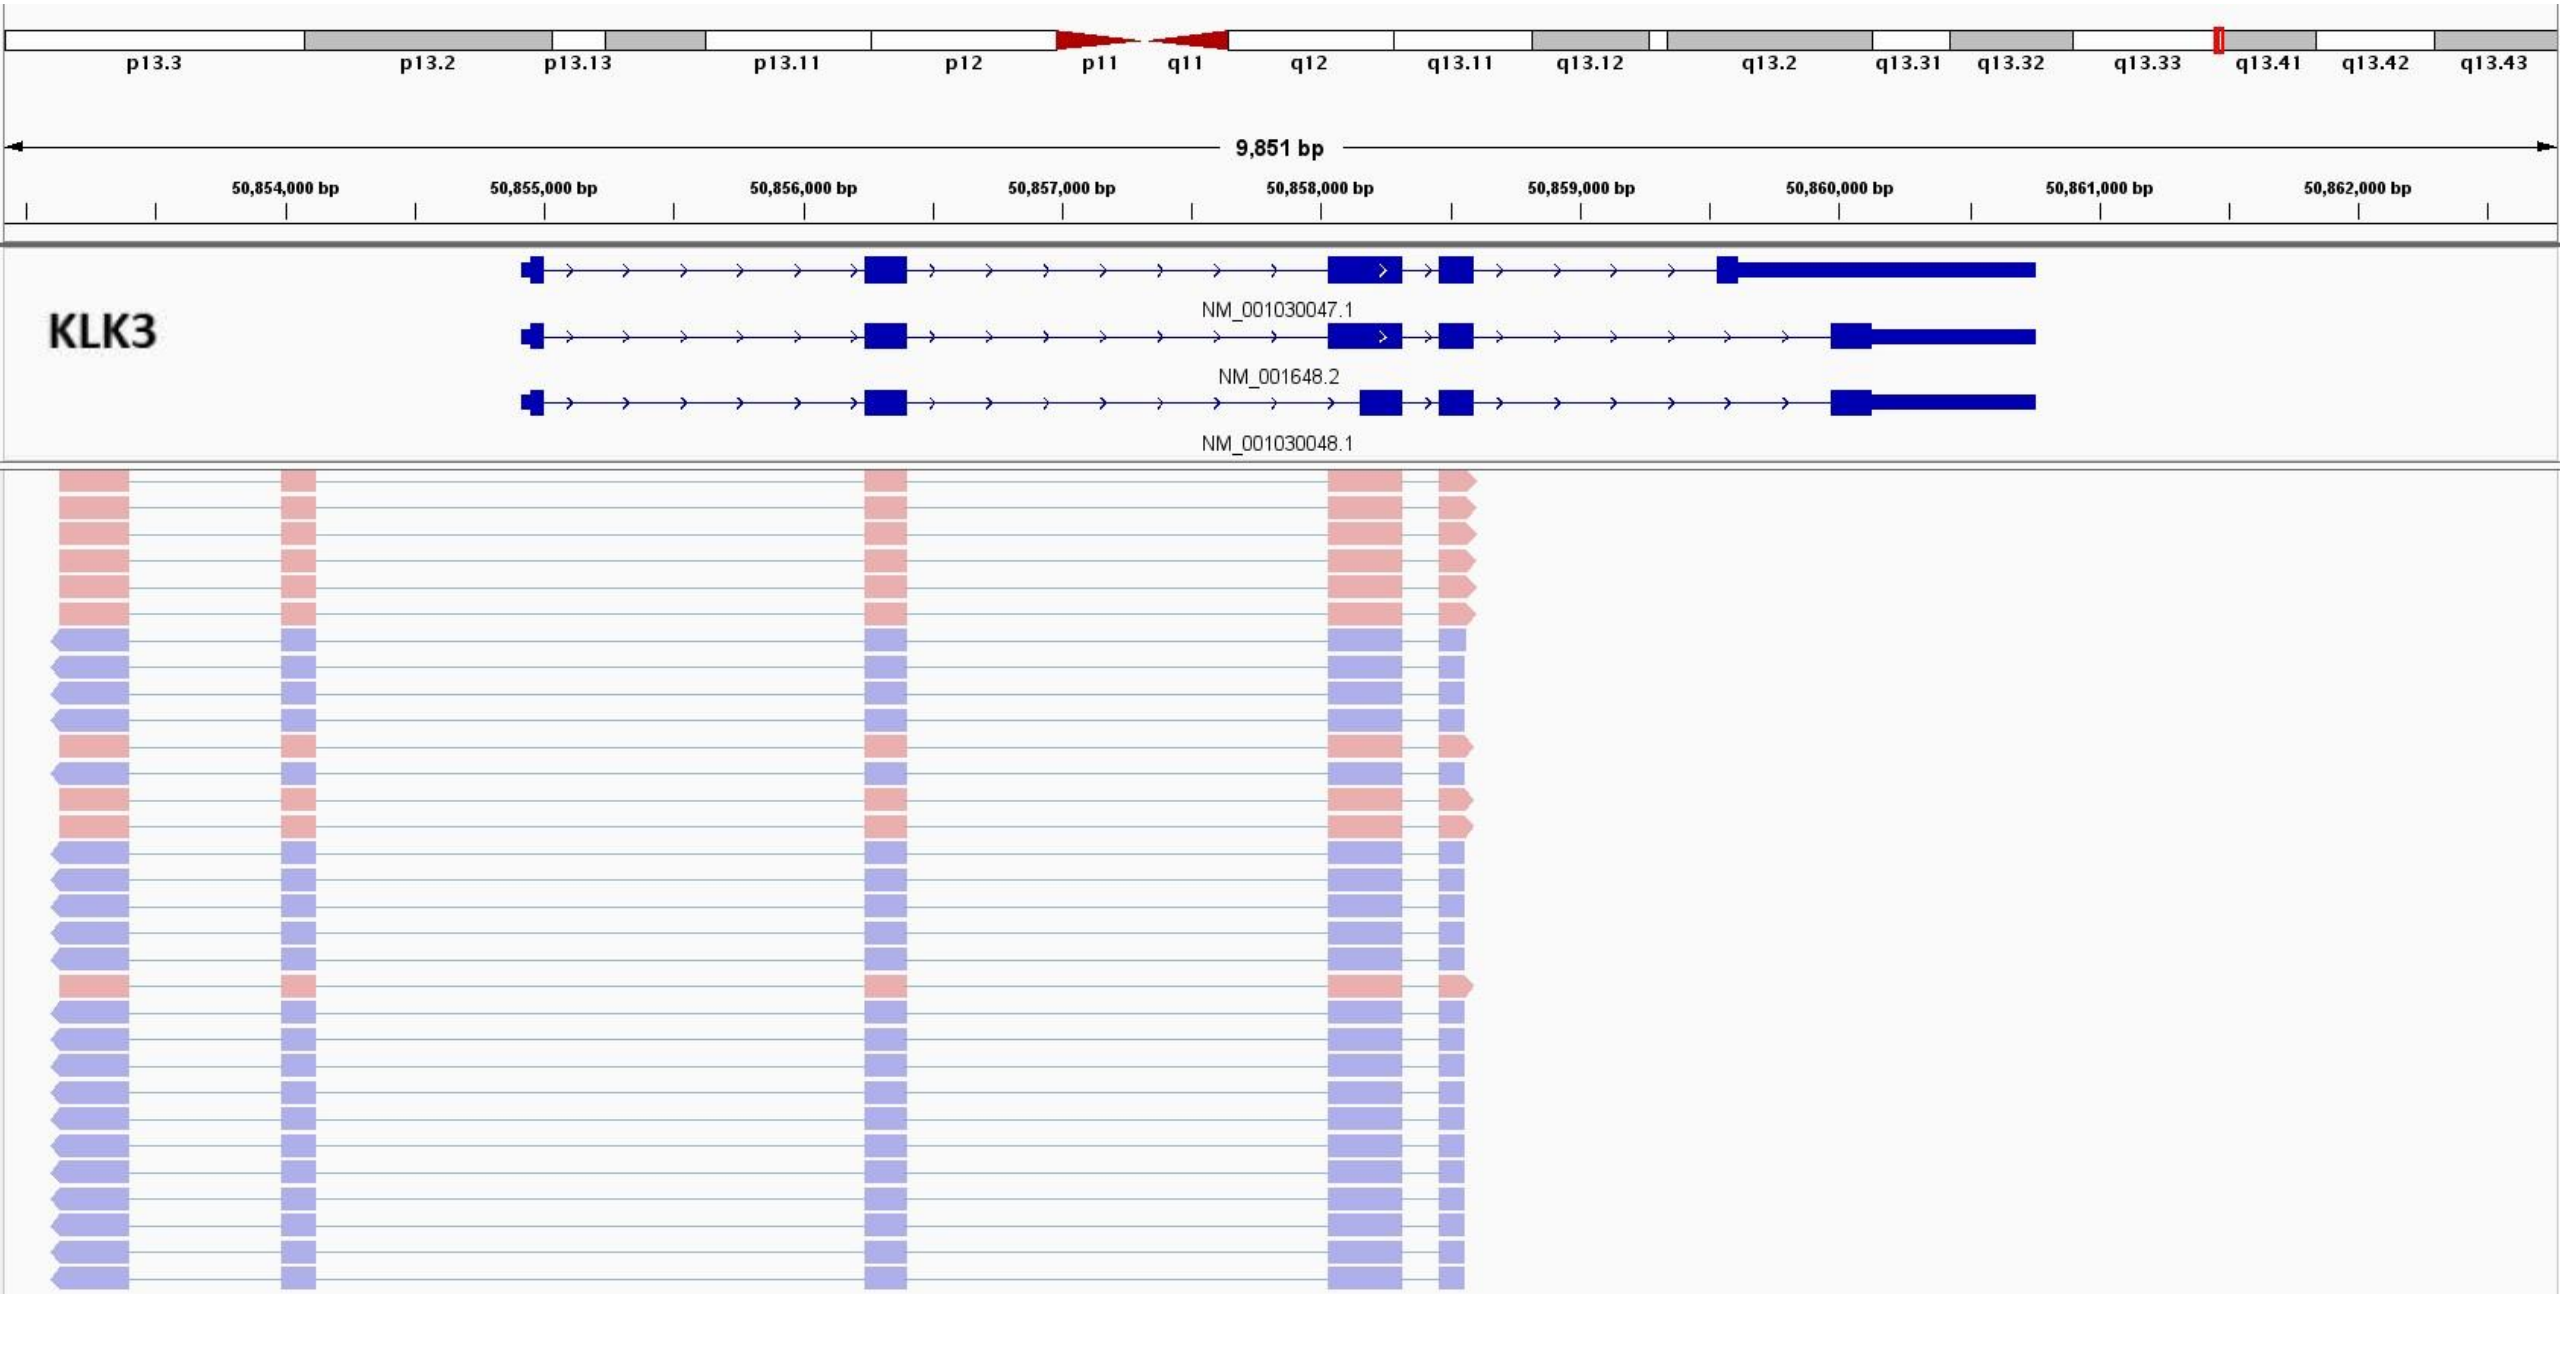

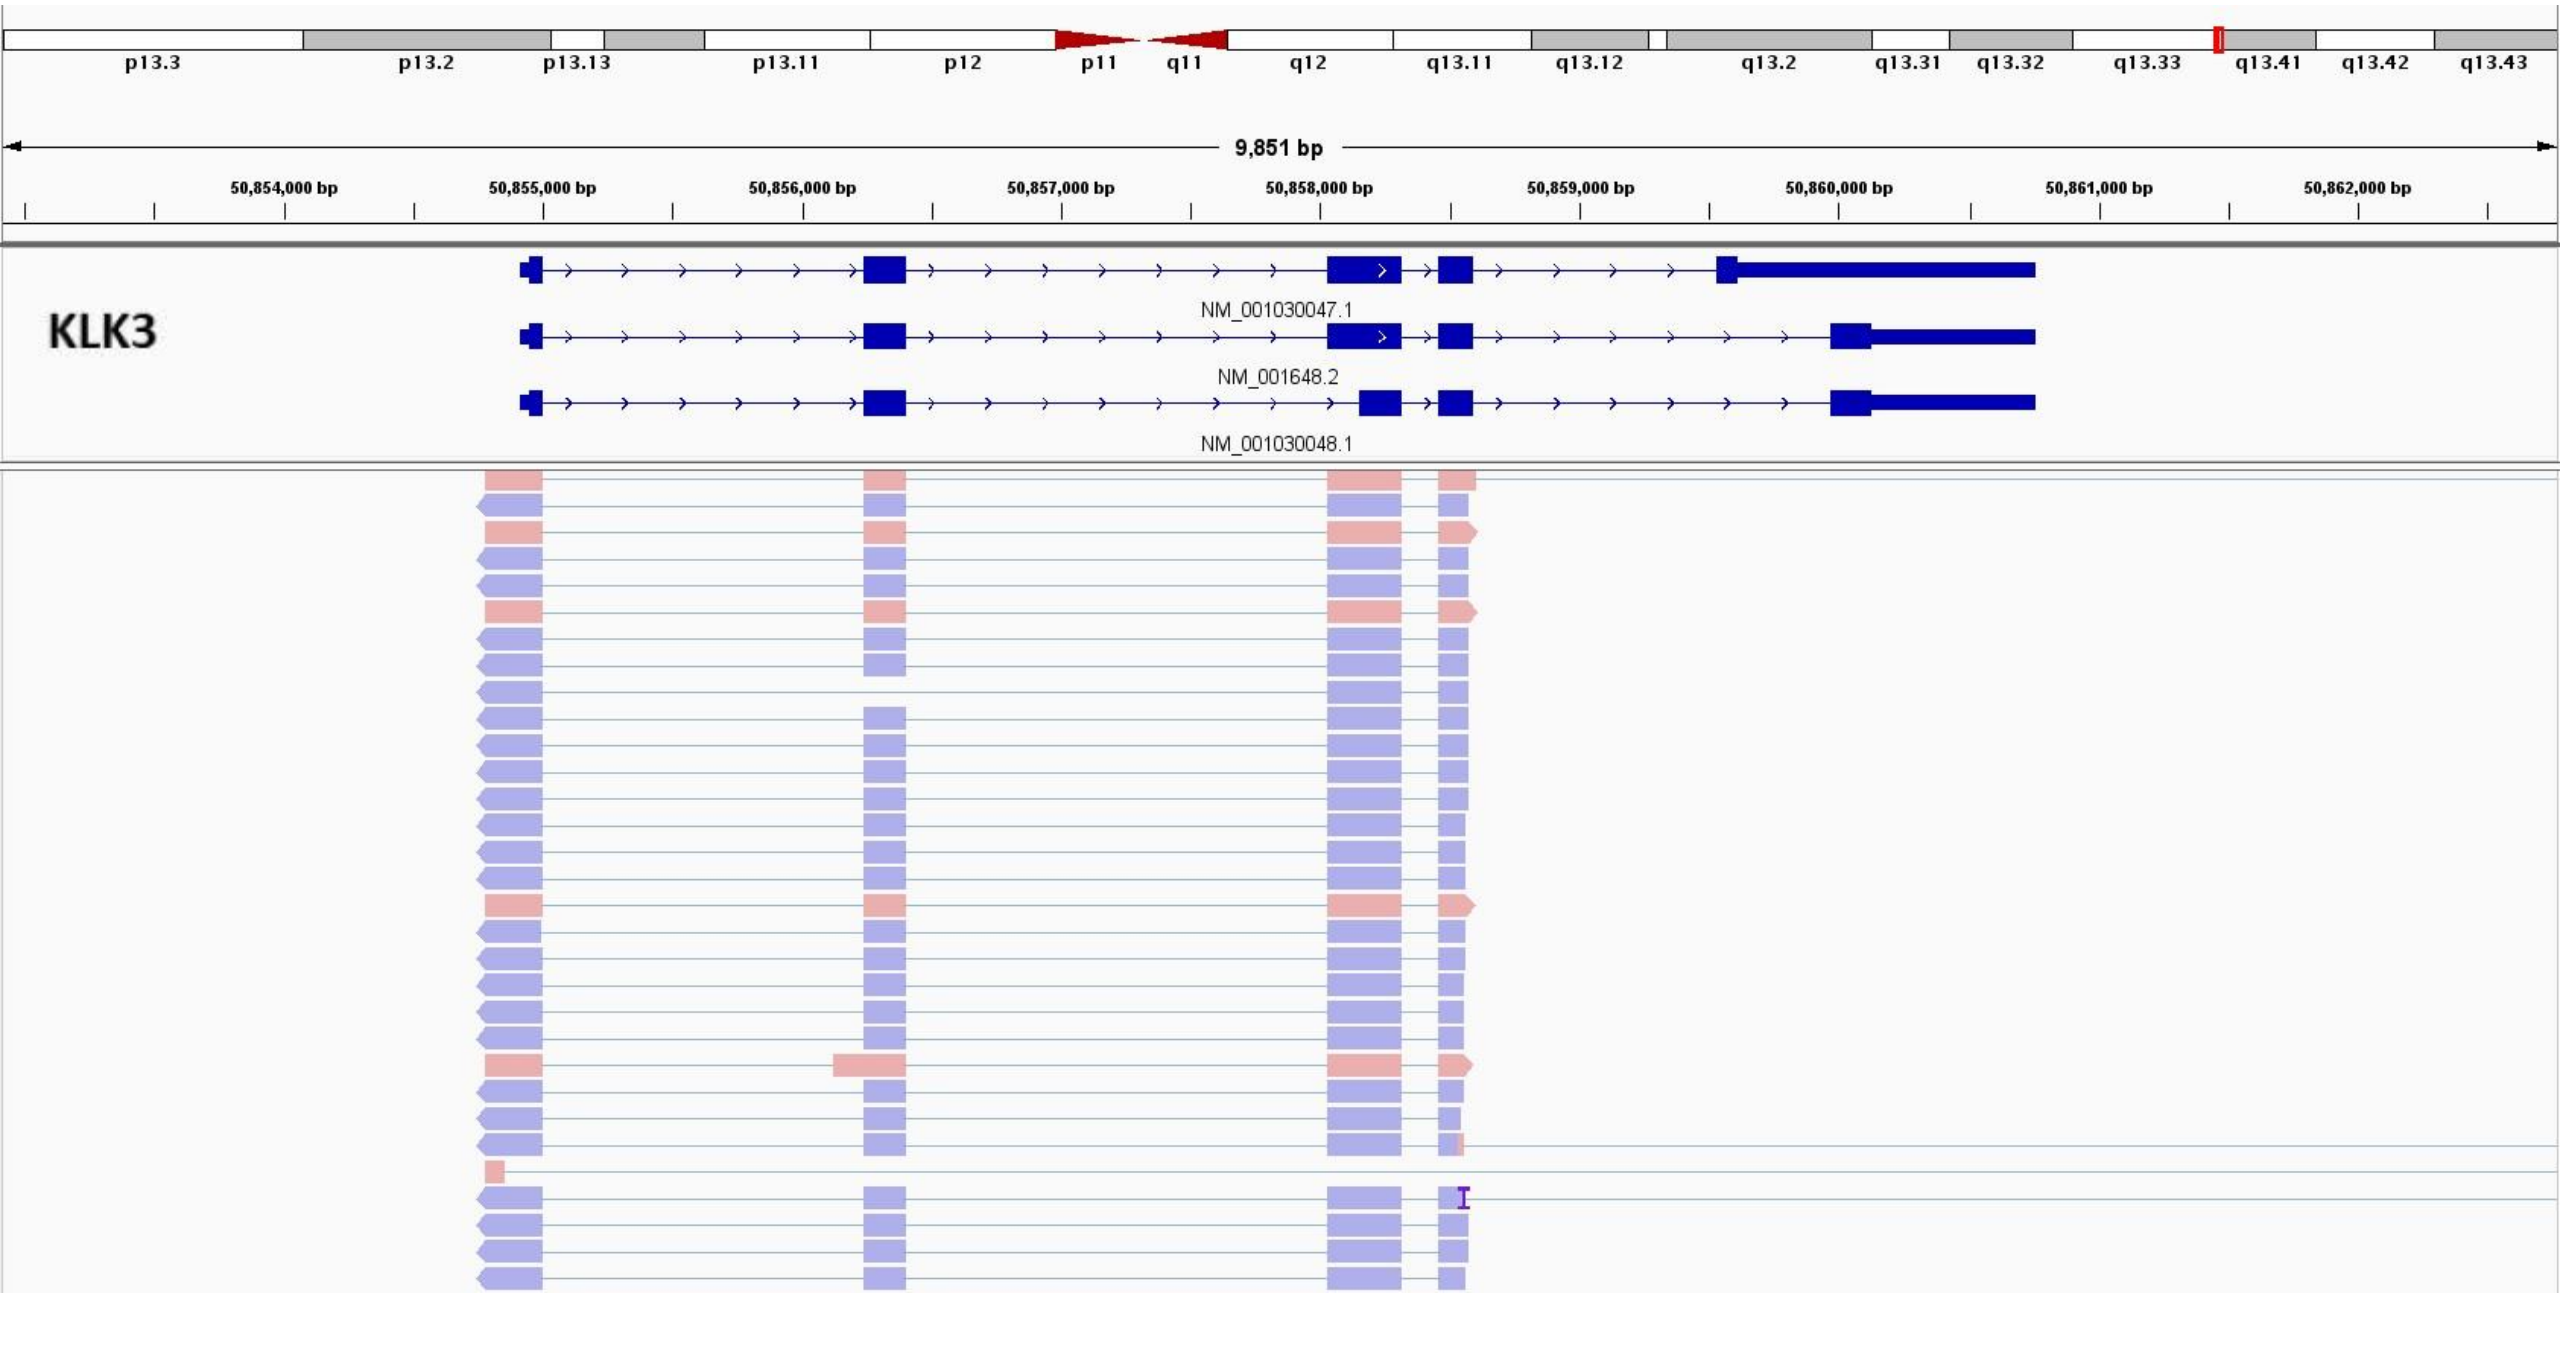

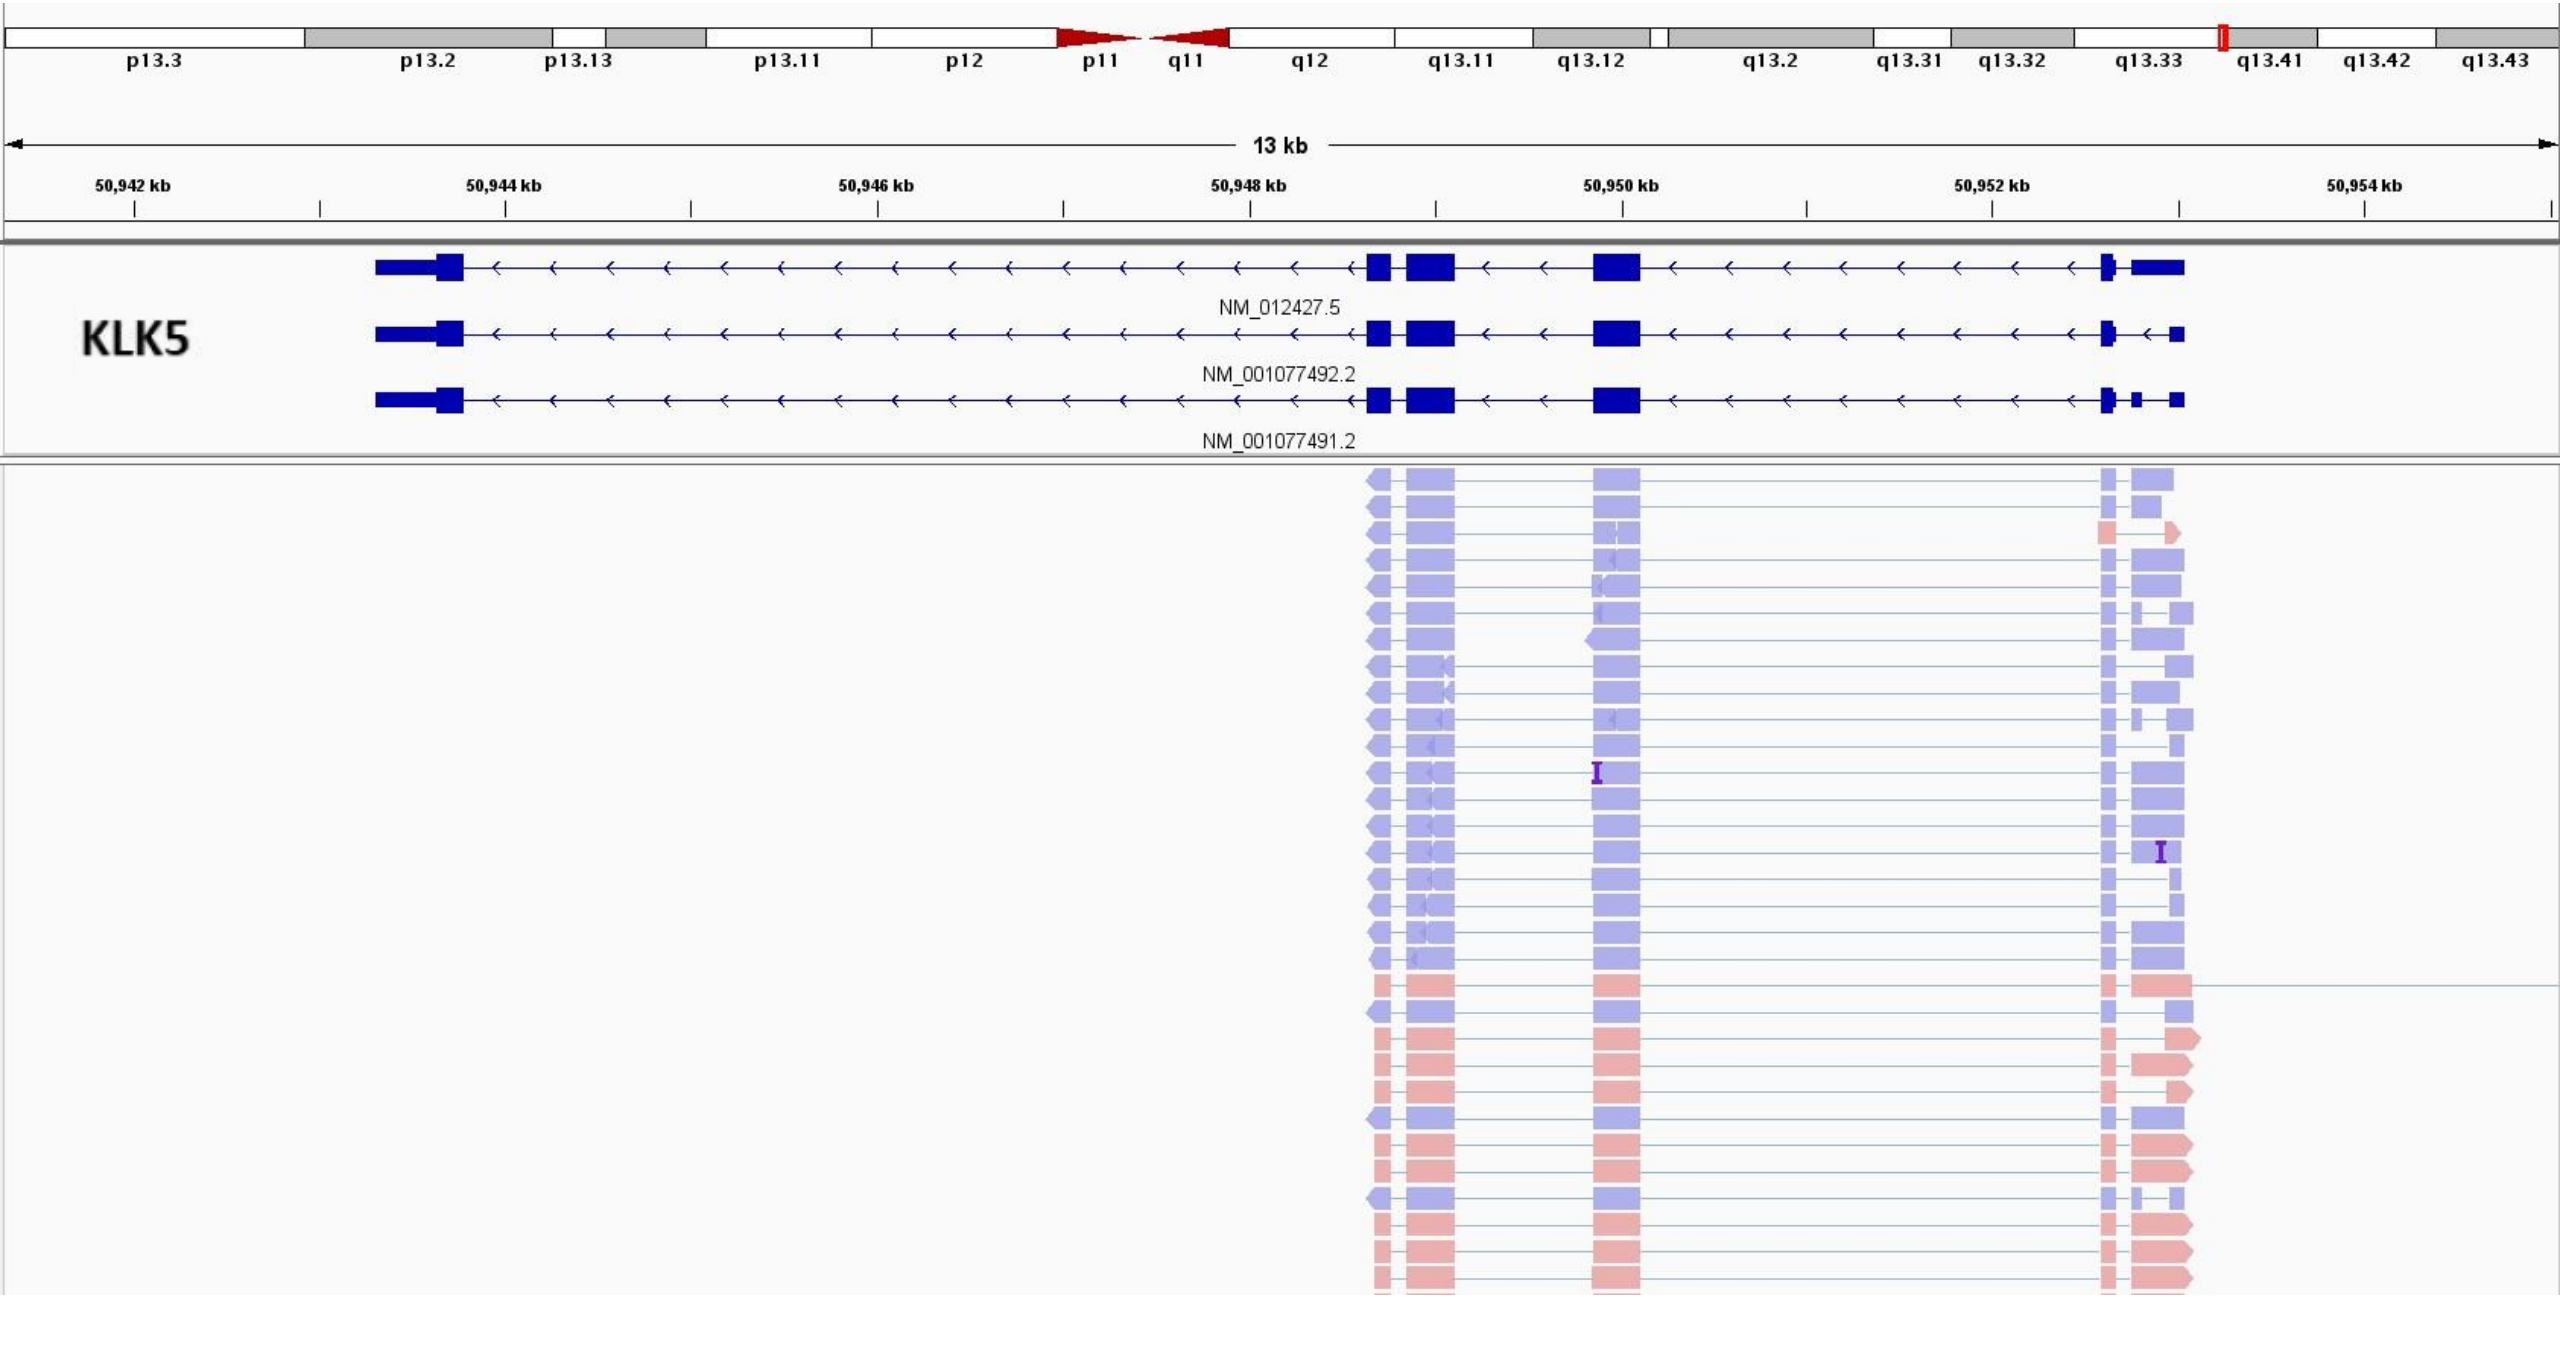

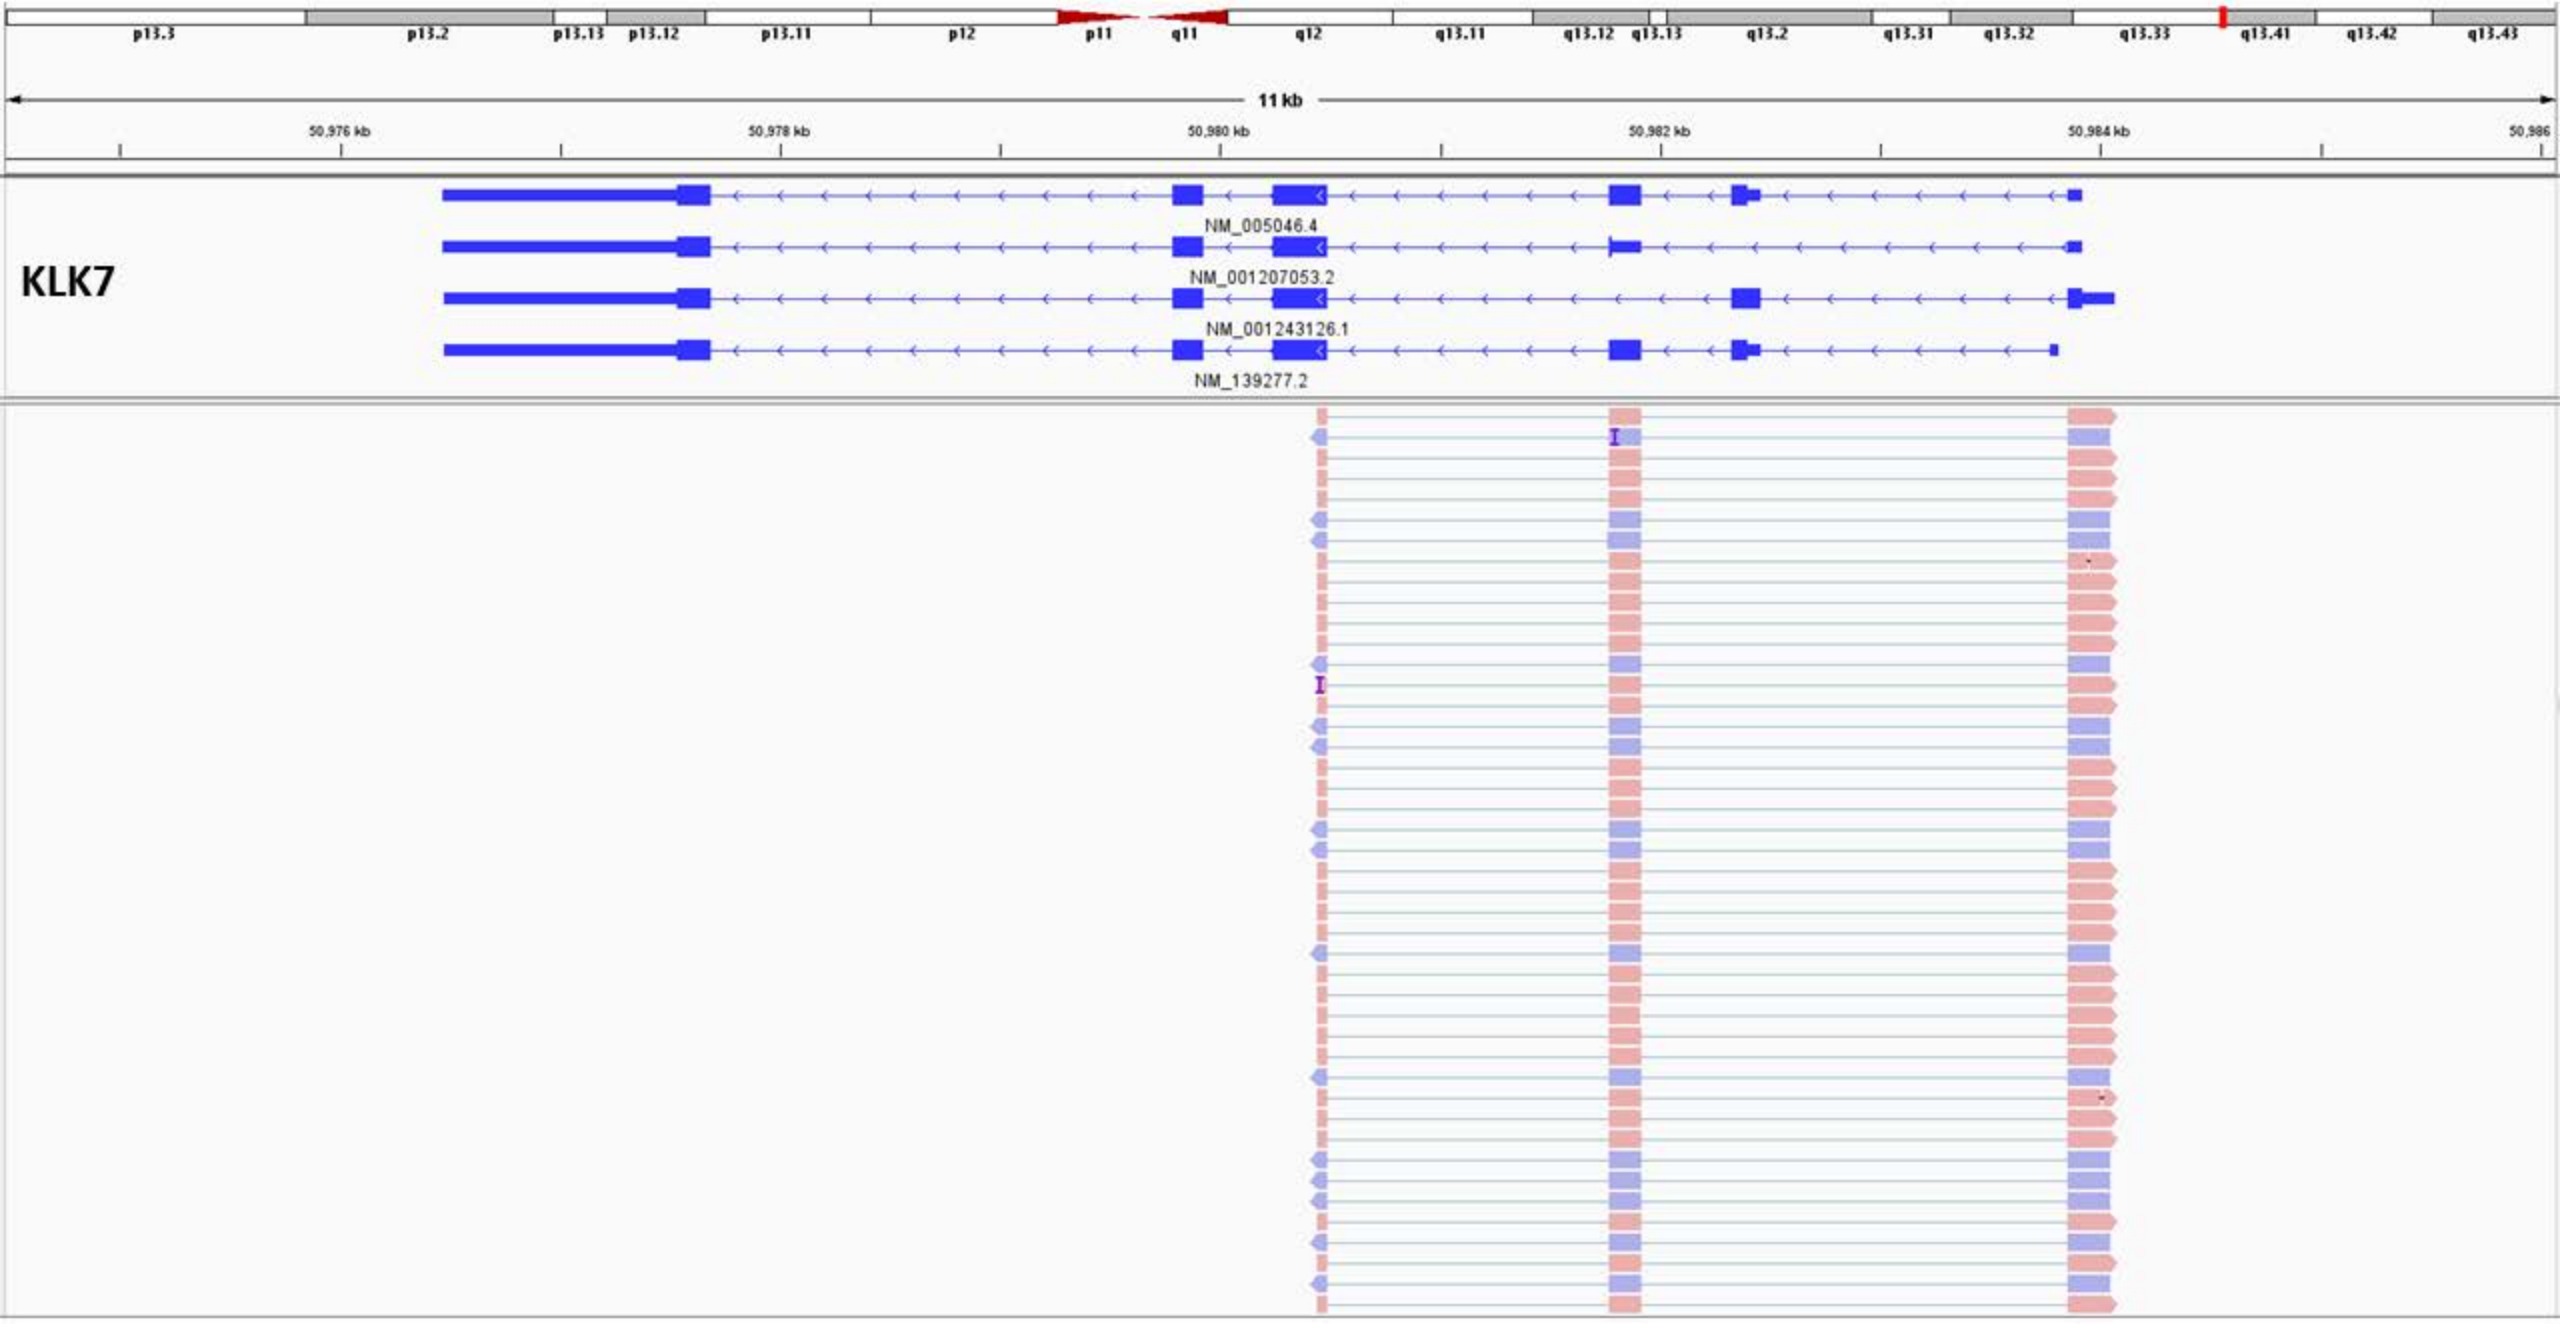

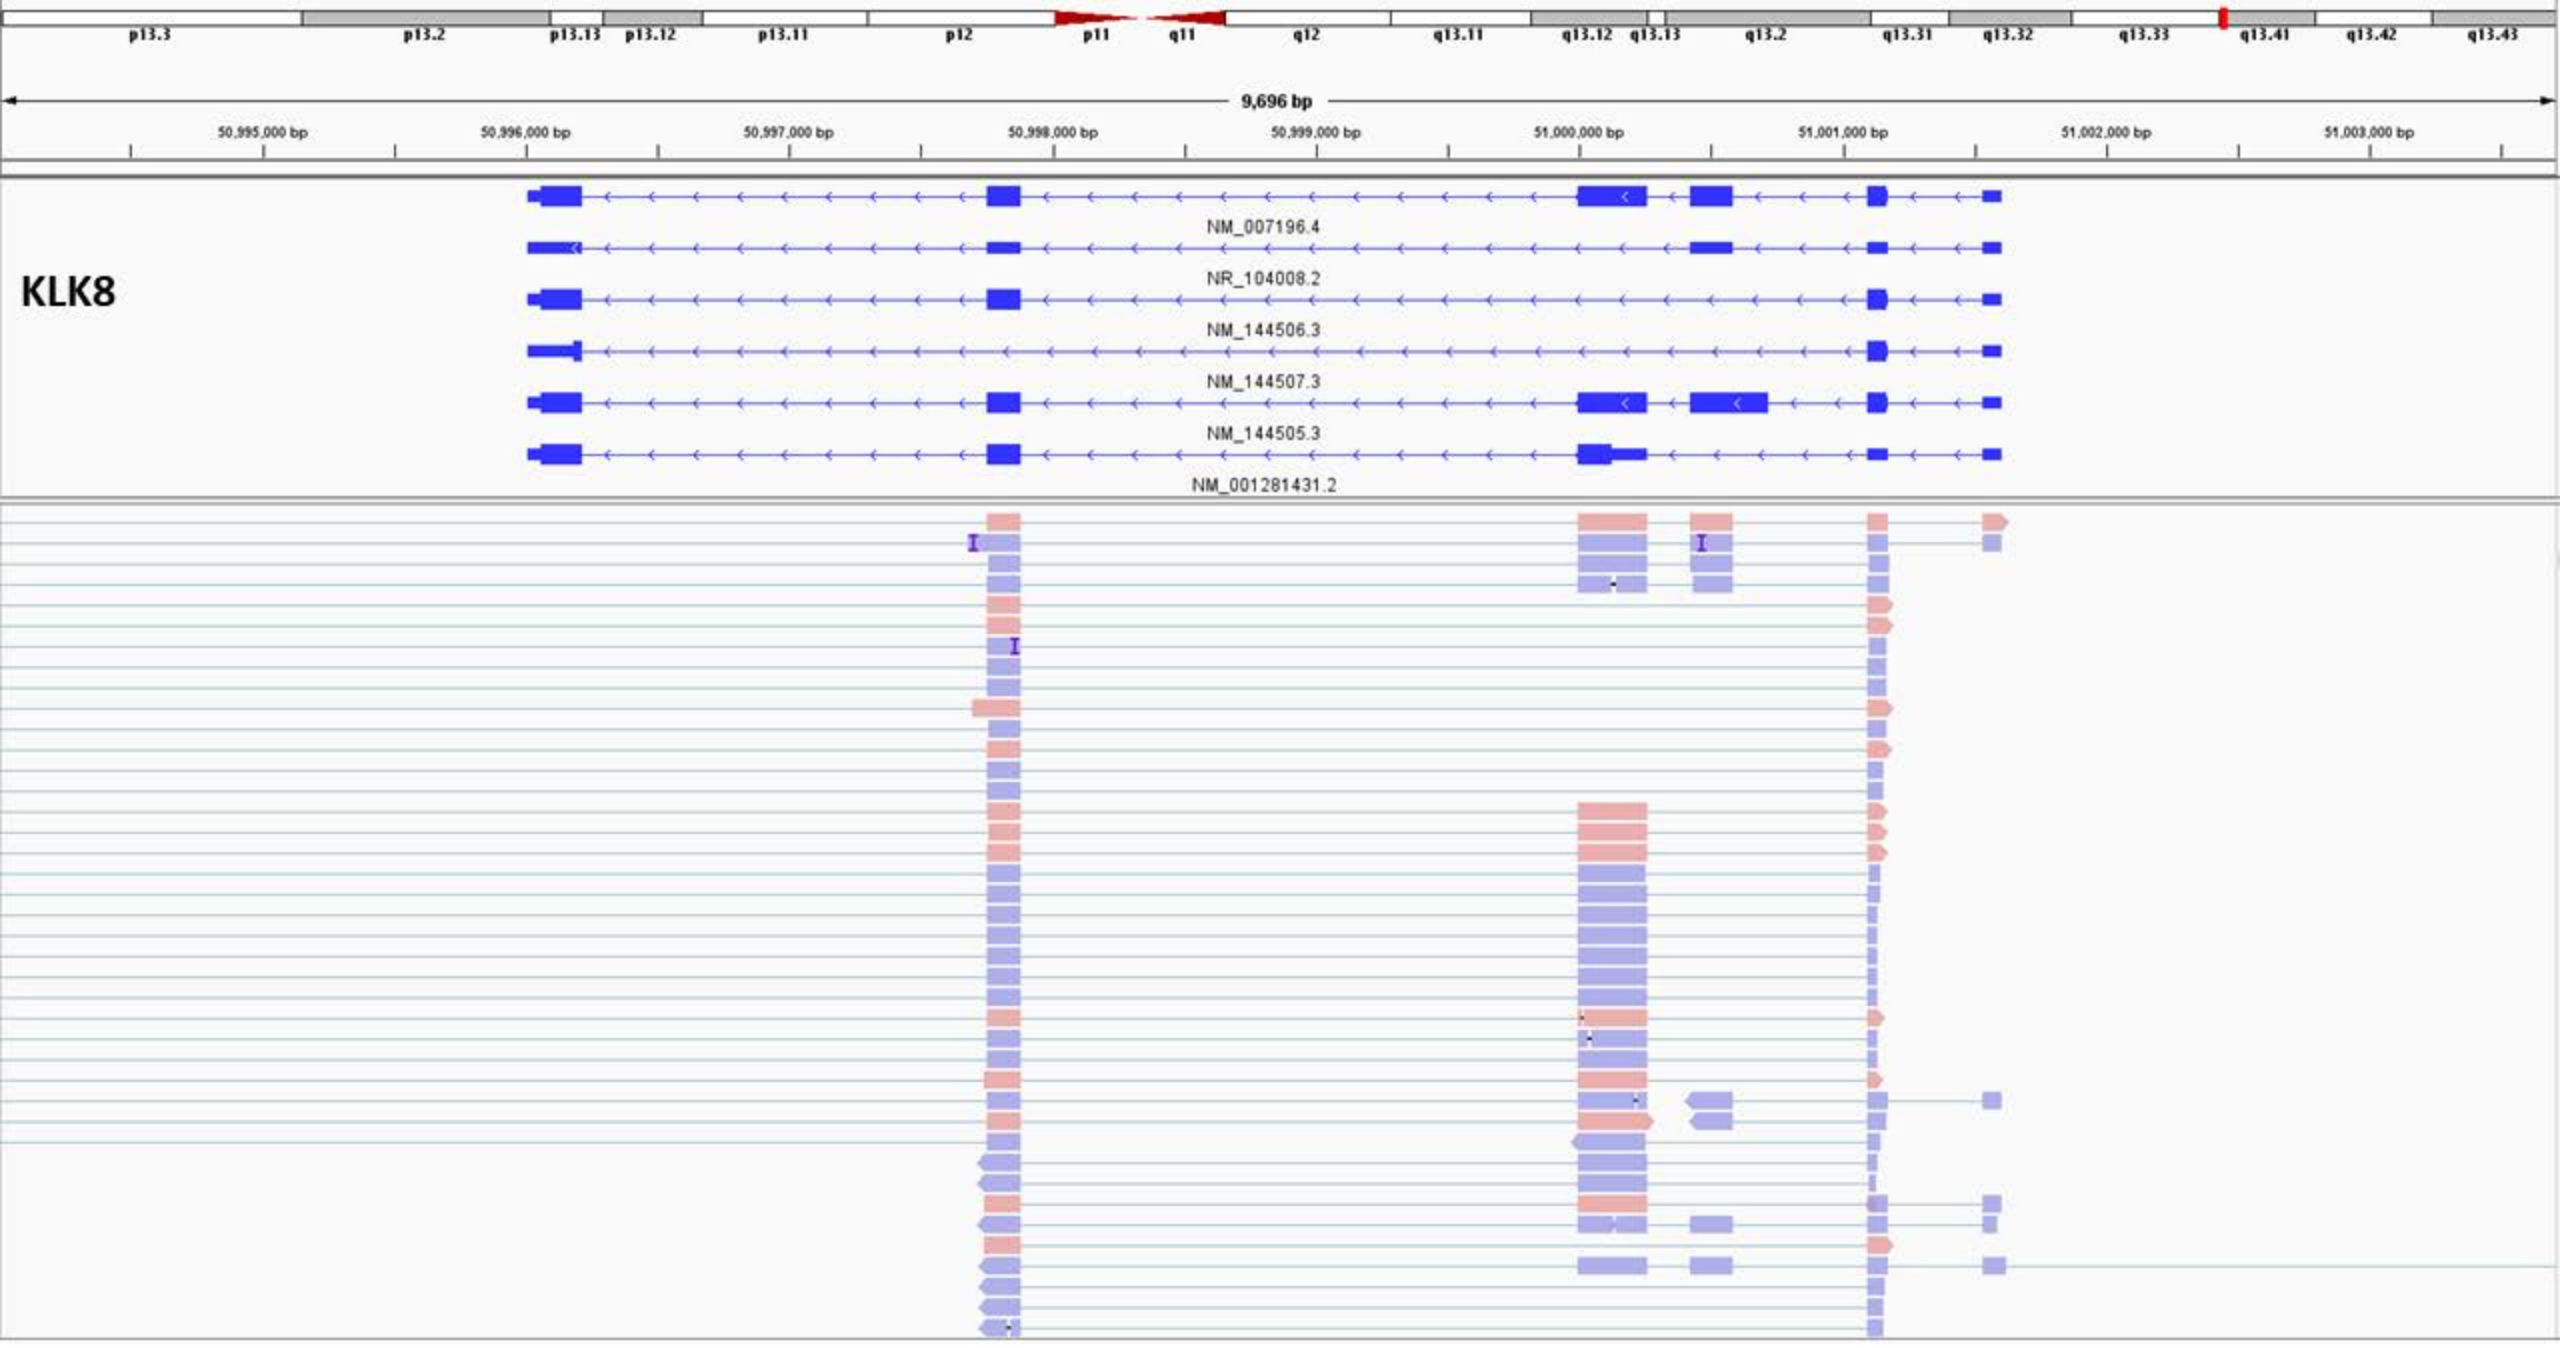

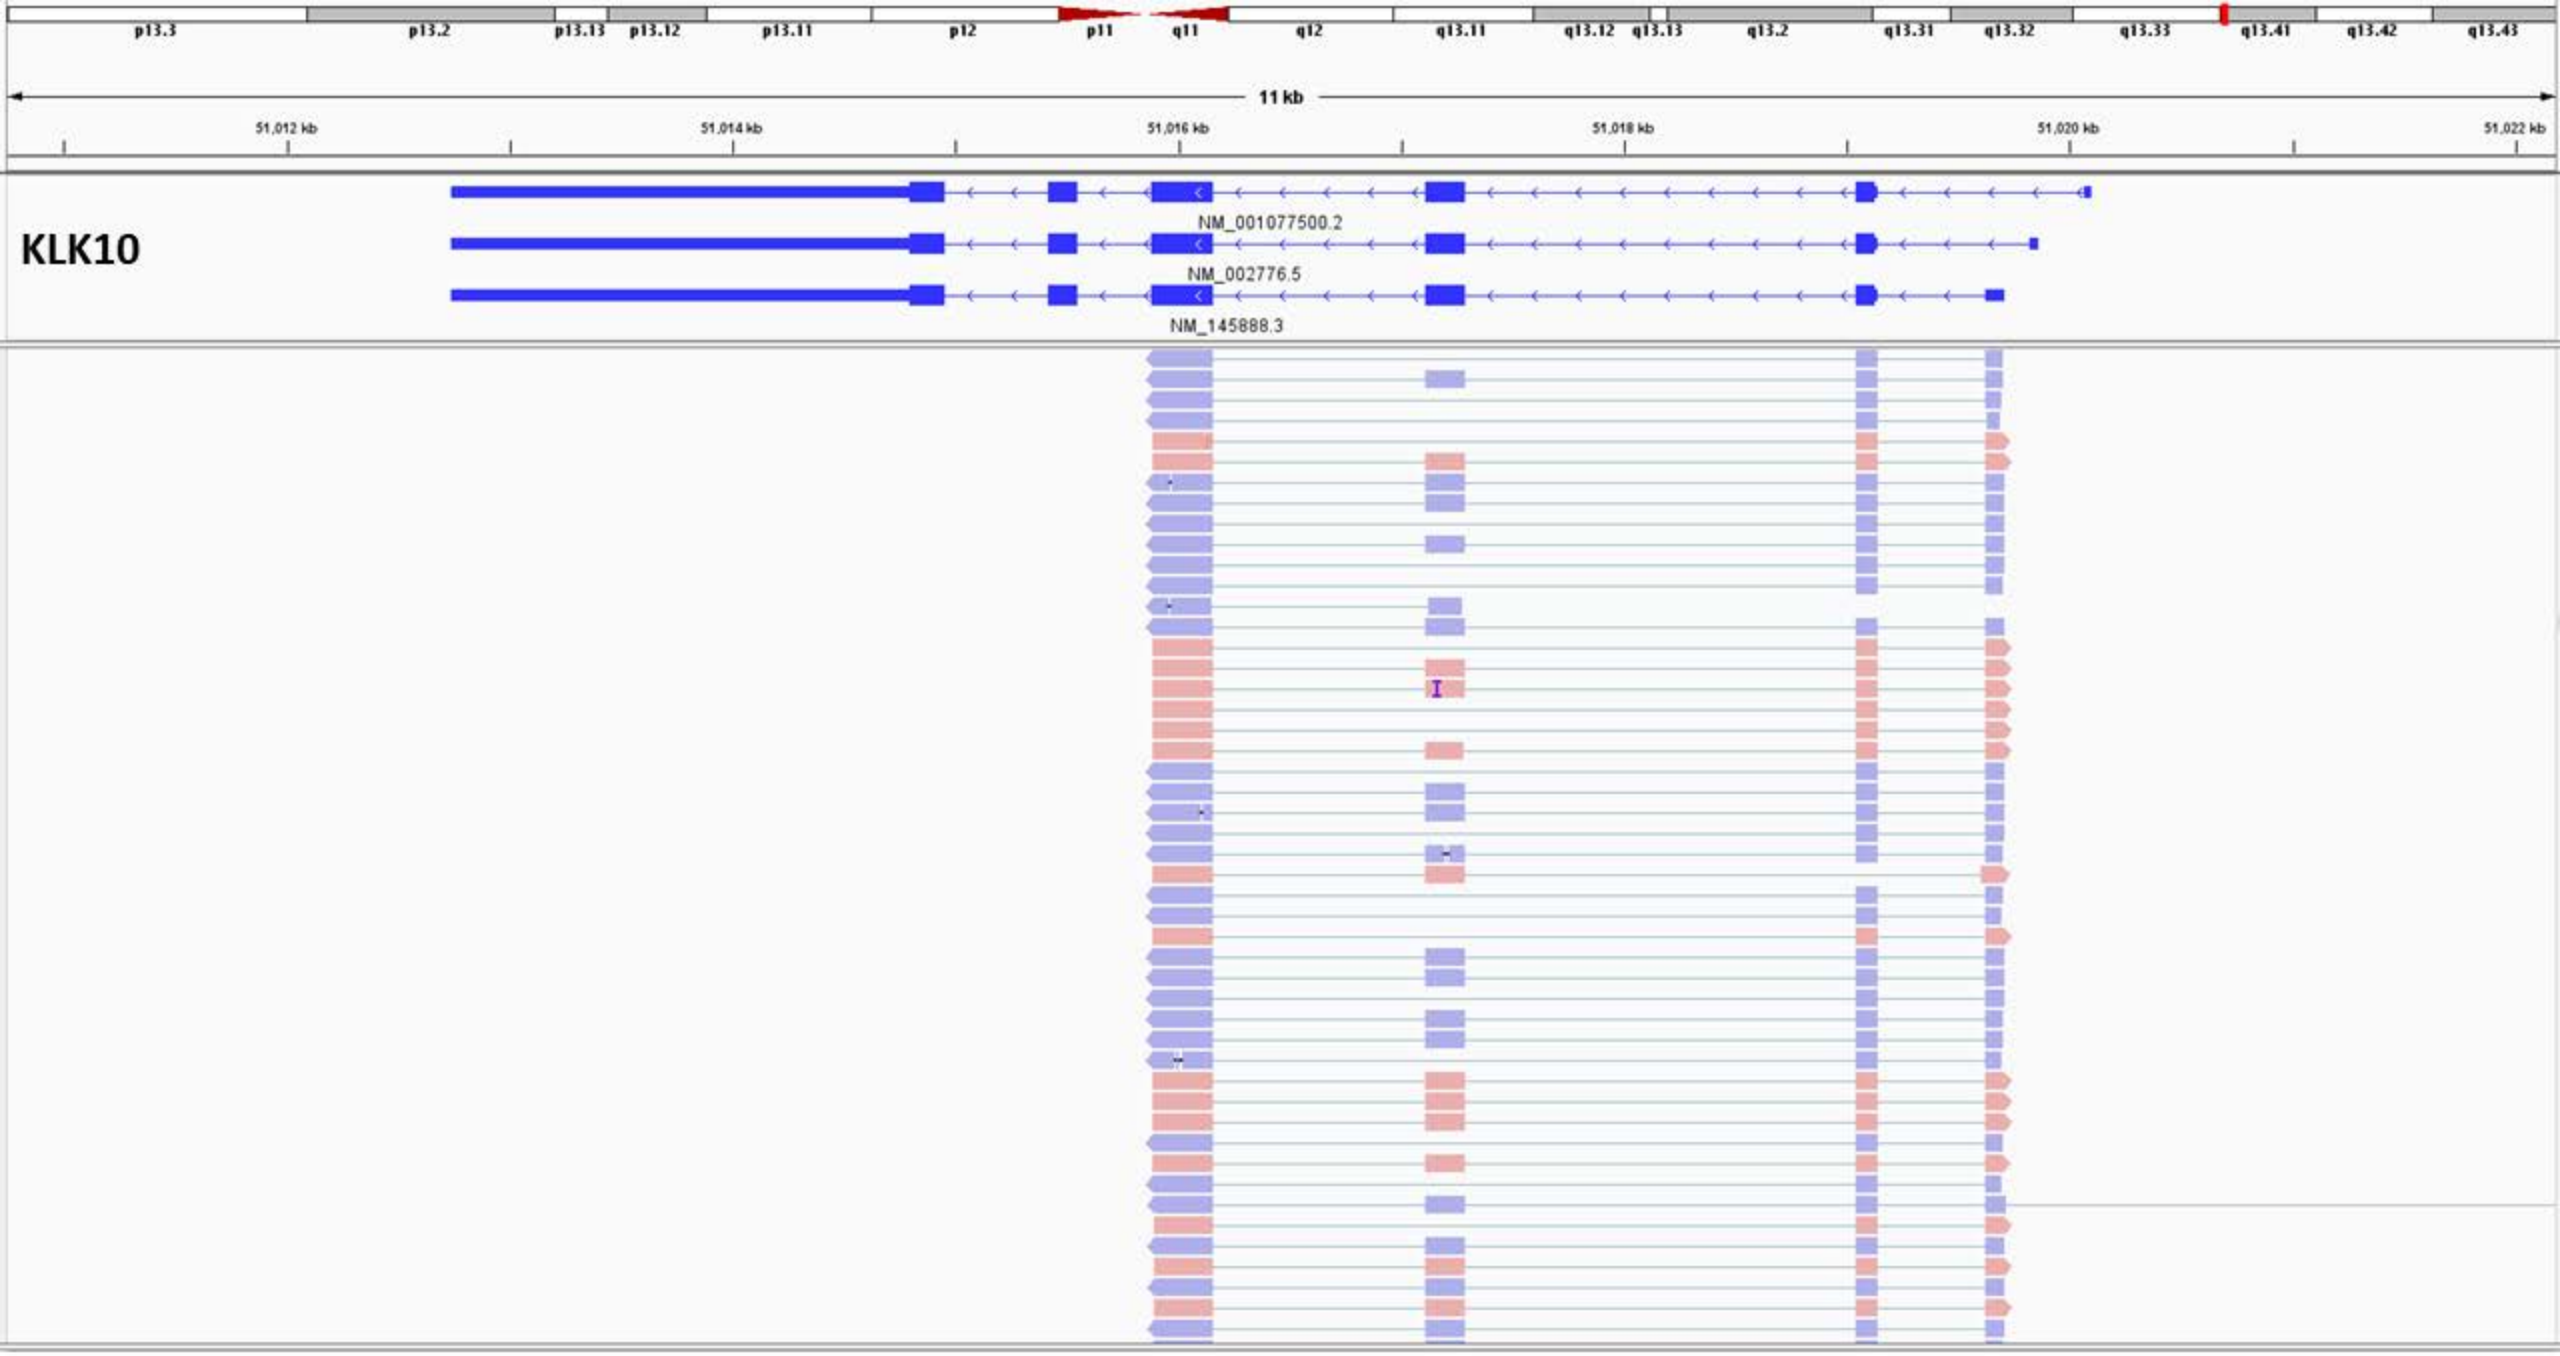



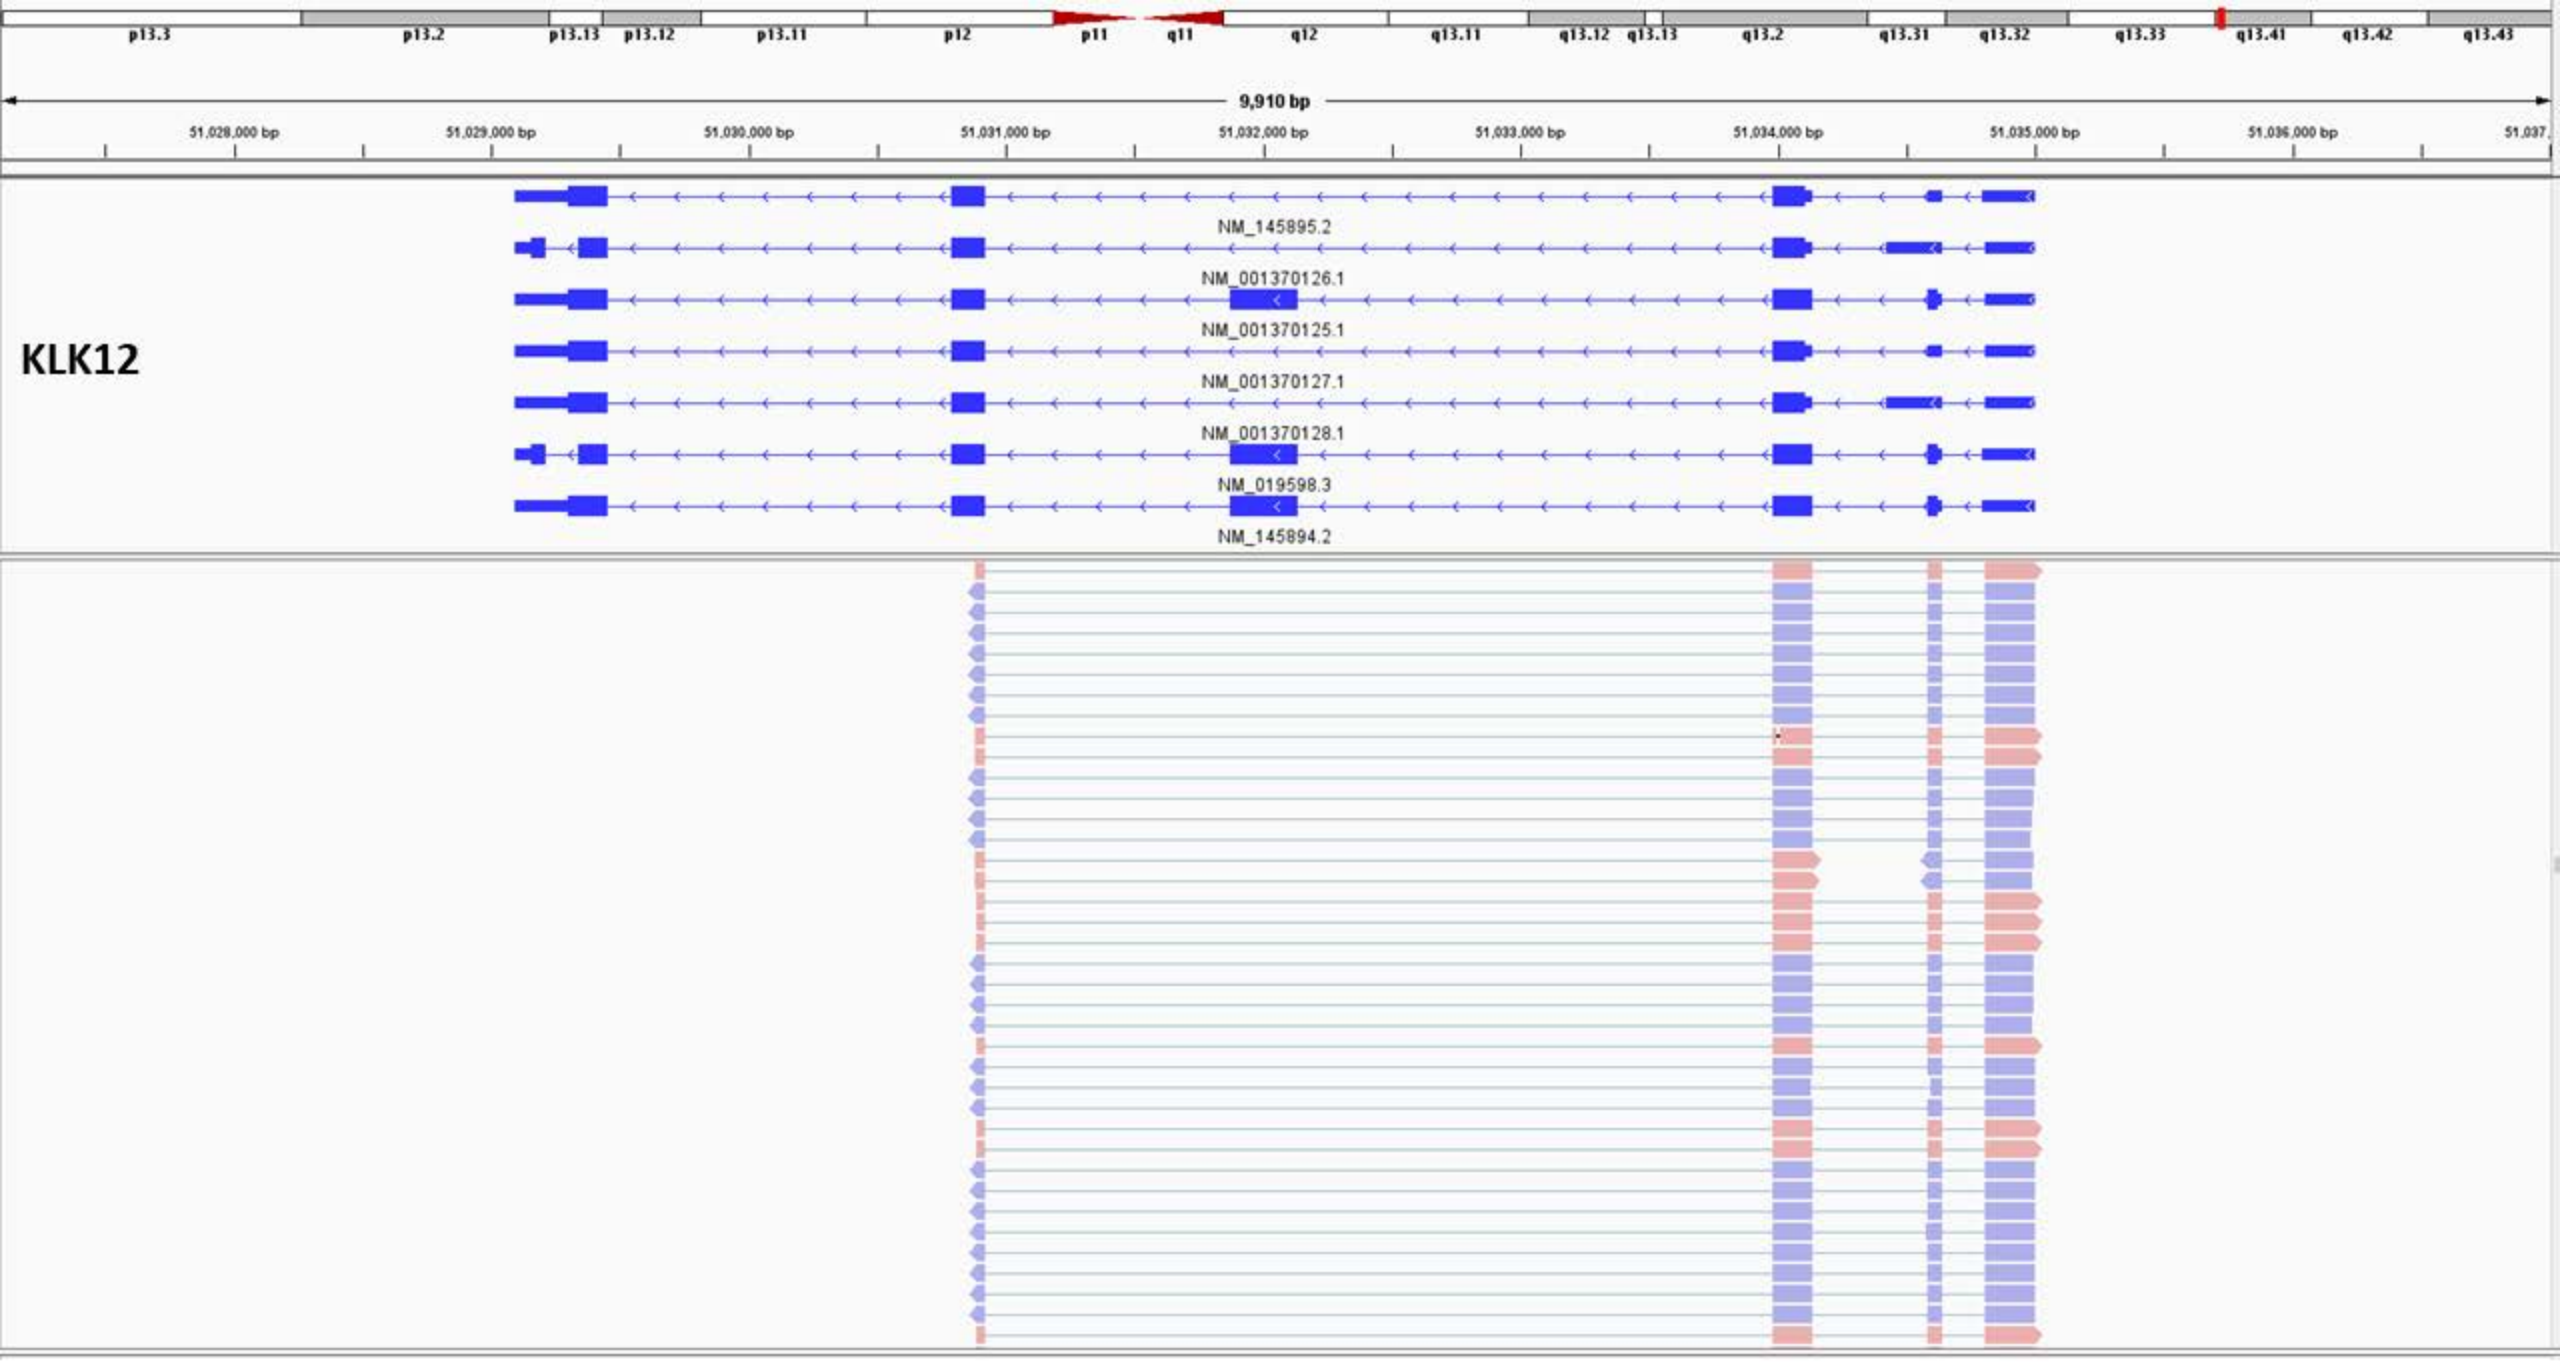

Supplement: 12864_2022_8386_MOESM7_ESM.pdf [file 12864_2022_8386_MOESM7_ESM.pdf]
